# Supplementary material for: Modulatory Effects of Tea-Derived Bioactives on Oral Microbiota and their Virulence-Reducing Properties
Source: Research Square preprint supplement (doi:10.21203/rs.3.rs-6468245/v1), 2025-08-11
Supplement: Supplementary file 1 [file 0074ff757d0f918892d137c7.docx]

**Modulatory Effects of Tea-Derived Bioactives on Oral Microbiota and their Virulence-Reducing Properties**

Meijing Liu*, Qian Luo, Xuefen Ding, Lin Gao, Yi Zhou & Xiaobin Chen*

Hawley & Hazel Chemical Co. (ZS) Ltd., Zhongshan, China

*Corresponding authors: Xiaobin Chen, Hawley & Hazel Chemical Co. (ZS) Ltd. 22, Jin Chang Industrial Road, 3rd Industrial Zone, Sha Lang, Western District, Zhongshan City, Guangdong Province, China, 528411. (O) 86-760-23786733; (email): [xiaobin_chen@darlie.com](mailto:xiaobin_chen@darlie.com). Meijing Liu, Ph.D., Hawley & Hazel Chemical Co. (ZS) Ltd. 22, Jin Chang Industrial Road, 3rd Industrial Zone, Sha Lang, Western District, Zhongshan City, Guangdong Province, China, 528411. (O) 86-760-23786738; (email): [iceandcandy@163.com](mailto:iceandcandy@163.com).

**Supporting Information Supplementary Table S1**. Primers used in the present study

| **Primers** | **Sequences (5' to 3')** | **Targets** | **References** |
| --- | --- | --- | --- |
| 16S-F | GACTCCTACGGGAGGCAGC | Universal | This study |
| 16S-R | GTATTACCGCGGCTGCTGGC |
| Bi-F | TTCGGGTTGTAAACCGCTTTT | *Bifidobacterium* spp. | 1 |
| Bi-R | TACGTATTACCGCGGCTGCT |
| La-F | TGGAAACAGATGCTAATACCG | *Lactobacillus* spp. | 2 |
| La-R | GTCCATTGTGGAAGATTCCC |
| Lr-F | GGACAGGTAGAAAGTCAACGA | *Lactobacillus rhamnosus* | 3 |
| Lr-R | GCTGACCGTAAACGCAATCTTAG |
| Lg-F | AGCGAGCTTGCCTAGATGAATTTG | *Lactobacillus gasseri* | 4 |
| Lg-R | TCTTTTAAACTCTAGACATGCGTC |
| S.sal.-F | TCTCGTTGAGATTGAAGCAATGA | *Streptococcus salivarius* | 5 |
| S.sal.-R | TGCGACATTCGTGTGAAATGG |
| S.sang.-F | GGATAGTGGCTCAGGGGCAGCCAGTT | *Streptococcus sanguinis* | 6 |
| S.sang.-R | GAACAGTGCTGGACTTGCTTGTC |
| Pg-F | TGGTTTCATGCAGCTTCTTT | *Porphyromonas gingivalis* | 7 |
| Pg-R | TCGGCACCTTCGTAATTCTT |
| Fn-F | GGTTCAGAAGTAGGACCGGGAGA | *Fusobacterium nucleatum* | 8 |
| Fn-R | ACTCCCTTAGAGCCATGAGGCAT |
| Pi-F | TTCGGAGACAAGGCAGGTGAT | *Prevotella intermedia* | 9 |
| Pi-R | CTTGCTTTCGCGTGTCTTGATA |

**Supplementary Table S2**. Primers used in the present study

| **Primers** | **Sequences (5' to 3')** | **Virulence genes** | **Associated function** | **References** |
| --- | --- | --- | --- | --- |
| Pg16S-F | TGTAGATGACTGATGGTGAAA | 16S rDNA | Housekeeper gene of  *P.* *gingivalis* | 10 |
| Pg16S-R | ACTGTTAGCAACTACCGATGT |
| kgp-F | AGCTGACAAAGGTGGAGACCAAAGG | Lysine-specific cysteine proteinase | Tissue destruction | 10 |
| kgp-R | TGTGGCATGAGTTTTTCGGAACCGT |
| rgpA-F | GCCGAGATTGTTCTTGAAGC | Arginine-gingipain A | Tissue destruction | 10 |
| rgpA-R | AGGAGCAGCAATTGCAAAG |
| fimA-F | CAGCAGGAAGCCATCAAATC | FimA type II fimbrilin | Host colonization | 10 |
| fimA-R | CAGTCAGTTCAGTTGTCAAT |
| hagA-F | ACAGCATCAGCCGATATTCC | Hemagglutinins A | Host colonization | 10 |
| hagA-R | CGAATTCATTGCCACCTTCT |
| hagB-F | TGTCGCACGGCAAATATCGCTAAAC | Hemagglutinins B | Host colonization | 10 |
| hagB-R | CTGGCTGTCCTCGTCGAAAGCATAC |
| hem-F | GAAGCCTTGTTCTCCTCA | Hemolysin | Heme acquisition | 10 |
| hem-R | CAATGAATATGCCGGTTTCC |
| htrA-F | GAGAGTGGGTATTGGCCGTA | High temperature requirement A | Stress protein | 10 |
| htrA-R | CCCGTTTGGCTGTAGATCAT |
| mgl-F | TCGTGCTTATGAGCGATGTC | L-methionine-α-deamino-γ-mercaptomethanelyase | Methyl mercaptan production | 11 |
| mgl-R | GGAAGTCACCCCTCGTGGATA |
| Fn16S-F | GGATTTATTGGGCGTAAAGC | 16S rDNA | Housekeeper gene of  *F.* *nucleatum* | 12 |
| Fn16S-R | GGCATTCCTACAAATATCTACGAA |
| fadA-F | TGCAGCAAGTTTAGTAGGTG | Focal adhesion A | Tissue destruction | 13 |
| fadA-R | CATTGTAAACTTGTTCATTTTGT |
| aid1-F | TACAGGAGGTGCCGTAGCAG | Adherence-inducing determinant 1 | Bacterial coaggregation | 13 |
| aid1-R | TTTTTGTTAATTCTCCAGCTCCA |
| fomA-F | AGAGTTTGATCCTGGCTCAG | *F. nucleatum* outer membrane protein | Bacterial coaggregation | 13 |
| fomA-R | GTCATCGTGCACACAGAATTGCTG |
| transp.-F | AGCAGCTATCGTGCCACTTT | ABC transporter  permease gene | Multidrug  resistance protein | 12 |
| transp.-R | TGTTGAATTGCTAGCTCCCA |
| megl-F | CACAAGACTAGGCAATCCTACA | L-methionineg-lyase | Hydrogen sulfide production | 14 |
| megl-R | GCTCCCATACCAGATGACATAG |
| Pi16s-F | CGGTCTGTTAAGCGTGTTGTG | 16S rDNA | Housekeeper gene of  *P.* *intermedia* | 12 |
| Pi16s-R | CACCATGAATTCCGCATACG |
| ecf-F | ATGGAAGCCTCGCAATTCAA | RNA polymerase ECF-type sigma factor | Against the host defense | 12 |
| ecf-R | TCCGTAAGTCCTGTTTCGGC |
| inpA-F | GAAGGACAACTACAGCGGAAA | Interpain A | Receptor interaction in bacterial infections | 15 |
| inpA-R | TCCTTTCGTTAGTTCGCTGA |
| groeS-F | AGCGGAGCAGAAAGTAGGTG | Heat shock protein | Protect the bacterial proteins | 16 |
| groeS-R | CAACAGCAAGAACGTCGCTT |

**References**

1 Gómez-Doñate, M., Ballesté, E., Muniesa, M. & Blanch Anicet, R. New Molecular Quantitative PCR Assay for Detection of Host-Specific Bifidobacteriaceae Suitable for Microbial Source Tracking. *Applied and Environmental Microbiology* **78**, 5788-5795 (2012).

2 Byun, R. *et al.* Quantitative Analysis of Diverse *Lactobacillus* Species Present in Advanced Dental Caries. *Journal of Clinical Microbiology* **42**, 3128-3136 (2004).

3 Jomehzadeh, N., Javaherizadeh, H., Amin, M., Rashno, M. & Teimoori, A. Quantification of Intestinal *Lactobacillus* Species in Children with Functional Constipation by Quantitative Real-Time PCR. *Clinical and Experimental Gastroenterology* **13**, 141-150 (2020).

4 Zou, K.-N. *et al.* Identification of vaginal fluid, saliva, and feces using microbial signatures in a Han Chinese population. *Journal of Forensic and Legal Medicine* **43**, 126-131 (2016).

5 Reid, P. *et al.* A TaqMan™-based quantitative PCR screening assay for the probiotic *Streptococcus salivarius* K12 based on the specific detection of its megaplasmid-associated salivaricin B locus. *Journal of Microbiological Methods* **170**, 105837 (2020).

6 Mitrakul, K., Vongsawan, K., Sriutai, A. & Thosathan, W. Association between *S. mutans* and *S. sanguinis* in Severe Early childhood Caries and Caries-Free Children A Quantitative Real-Time PCR Analysis. *J Clin Pediatr Dent* **40**, 281-289 (2016).

7 Decat, E. *et al.* Optimization of quantitative polymerase chain reactions for detection and quantification of eight periodontal bacterial pathogens. *BMC Research Notes* **5**, 664 (2012).

8 Sawant, S., Dugad, J., Parikh, D. & Singh, H. Absolute quantitation of oral bacteria involved in oral cancer by real-time PCR. *Medicine in Microecology* **7**, 100034 (2021).

9 Park, S.-N., Lim, Y. K. & Kook, J.-K. Development of quantitative real-time PCR primers for detecting 42 oral bacterial species. *Archives of Microbiology* **195**, 473-482 (2013).

10 Fournier-Larente, J., Morin, M.-P. & Grenier, D. Green tea catechins potentiate the effect of antibiotics and modulate adherence and gene expression in *Porphyromonas gingivalis*. *Archives of Oral Biology* **65**, 35-43 (2016).

11 Xu, X., Zhou, X. D. & Wu, C. D. Tea Catechin EGCg Suppresses the mgl Gene Associated with Halitosis. *Journal of Dental Research* **89**, 1304-1308 (2010).

12 Herrero, E. R. *et al.* Dysbiotic Biofilms Deregulate the Periodontal Inflammatory Response. *Journal of Dental Research* **97**, 547-555 (2018).

13 Song, B. *et al.* Akkermansia muciniphila inhibited the periodontitis caused by *Fusobacterium nucleatum*. *npj Biofilms and Microbiomes* **9**, 49 (2023).

14 Chen, Y.-W. *et al.* Genetic Determinants of Hydrogen Sulfide Biosynthesis in *Fusobacterium nucleatum* Are Required for Bacterial Fitness, Antibiotic Sensitivity, and Virulence. *mBio* **13**, e01936-01922 (2022).

15 Moghimi, M. *et al.* Interaction of human oral cancer and the expression of virulence genes of dental pathogenic bacteria. *Microbial Pathogenesis* **149**, 104464 (2020).

16 Rodriguez Herrero, E. *et al.* Necrotrophic growth of periodontopathogens is a novel virulence factor in oral biofilms. *Scientific Reports* **7**, 1107 (2017).
